# Supplementary material for: The Role of the Yap5 Transcription Factor in Remodeling Gene Expression in Response to Fe Bioavailability
Source: PLOS journal article supplement (doi:10.1371/journal.pone.0037434), 2012-05-16
Supplement: S1 (10.1371/journal.pone.0037434.s001) [file journal.pone.0037434.s001]

**Table S1.** Genes whose mRNA steady-state levels are altered in Fe excess (2mM FeSO<sub>4</sub>)

| Systematic Name                               | Gene Name | Fold Change | Description                                                                                          |
|-----------------------------------------------|-----------|-------------|------------------------------------------------------------------------------------------------------|
| <b>METABOLISM</b>                             |           |             |                                                                                                      |
| <b>Amino acid metabolism</b>                  |           |             |                                                                                                      |
| YJR109C                                       | CPA2      | -2.4        | Large subunit of carbamoyl phosphate synthetase                                                      |
| YOL058W                                       | ARG1      | -2.2        | Arginosuccinate synthetase                                                                           |
| YDL182W                                       | LYS20     | -2.1        | Homocitrate synthase isozyme                                                                         |
| YOR302W                                       |           | -1.9        | CPA1 uORF                                                                                            |
| YOR303W                                       | CPA1      | -1.8        | Small subunit of carbamoyl phosphate synthetase                                                      |
| YER069W                                       | ARG5,6    | -1.7        | Protein that is processed in the mitochondrion to yield acetylglutamate kinase and N-acetyl-gamma-gl |
| YHR018C                                       | ARG4      | -1.6        | Argininosuccinate lyase                                                                              |
| YJL088W                                       | ARG3      | -1.6        | Ornithine carbamoyltransferase                                                                       |
| YGR055W                                       | MUP1      | 1.4         | High affinity methionine permease                                                                    |
| YMR020W                                       | FMS1      | 1.5         | Polyamine oxidase                                                                                    |
| YIL042C                                       | PKP1      | 1.5         | Mitochondrial protein kinase                                                                         |
| YER091C                                       | MET6      | 1.7         | Cobalamin-independent methionine synthase                                                            |
| YDR502C                                       | SAM2      | 1.9         | S-adenosylmethionine synthetase                                                                      |
| YBR208C                                       | DUR1,2    | 2.3         | Urea amidolyase                                                                                      |
| <b>C-Compound and Carbohydrate metabolism</b> |           |             |                                                                                                      |
| YLR345W                                       |           | 1.5         | Similar to 6-phosphofructo-2-kinase                                                                  |
| YOR374W                                       | ALD4      | 1.5         | Mitochondrial aldehyde dehydrogenase                                                                 |
| YDL124W                                       |           | 1.5         | NADPH-dependent alpha-keto amide reductase                                                           |
| YNL134C                                       |           | 1.6         | Putative protein of unknown function with similarity to dehydrogenases                               |
| YLR251W                                       | SYM1      | 1.6         | Protein required for ethanol metabolism                                                              |
| YOR347C                                       | PYK2      | 1.6         | Pyruvate kinase that appears to be modulated by phosphorylation                                      |
| YOR344C                                       | TYE7      | 1.6         | Serine-rich protein that contains a basic-helix-loop-helix (bHLH) DNA binding motif                  |
| YNL274C                                       | GOR1      | 1.6         | Glyoxylate reductase                                                                                 |
| YLR258W                                       | GSY2      | 1.8         | Glycogen synthase                                                                                    |
| YPR160W                                       | GPH1      | 1.8         | Non-essential glycogen phosphorylase                                                                 |
| YCL040W                                       | GLK1      | 2.2         | Glucokinase                                                                                          |
| YFR015C                                       | GSY1      | 2.2         | Glycogen synthase                                                                                    |
| YFR053C                                       | HXK1      | 2.3         | Hexokinase isoenzyme 1                                                                               |
| YJL153C                                       | INO1      | 3.6         | L-myo-inositol-1-phosphate synthase                                                                  |

**Lipid, fatty acid and isoprenoid metabolism**

|         |      |      |                                                                      |
|---------|------|------|----------------------------------------------------------------------|
| YGL055W | OLE1 | -2.3 | Delta-9-fatty acid desaturase                                        |
| YMR246W | FAA4 | -1.9 | Long chain fatty acyl-CoA synthetase                                 |
| YBL039C | URA7 | -1.7 | Major CTP synthase isozyme                                           |
| YLR056W | ERG3 | -1.5 | C-5 sterol desaturase                                                |
| YDR096W | GIS1 | 1.4  | JmjC domain-containing histone demethylase                           |
| YNL169C | PSD1 | 1.4  | Phosphatidylserine decarboxylase of the mitochondrial inner membrane |
| YER026C | CHO1 | 1.6  | Phosphatidylserine synthase                                          |
| YBR183W | YPC1 | 1.8  | Alkaline ceramidase                                                  |
| YJR073C | OPI3 | 2.4  | Phospholipid methyltransferase                                       |

**RESPIRATION**

|           |        |     |                                                                       |
|-----------|--------|-----|-----------------------------------------------------------------------|
| YML120C   | NDI1   | 1.4 | NADH:ubiquinone oxidoreductase                                        |
| YJR034W   | PET191 | 1.4 | Protein required for assembly of cytochrome c oxidase                 |
| YHR001W-a | QCR10  | 1.4 | Subunit of the ubiquinol-cytochrome c oxidoreductase complex          |
| YJL166W   | QCR8   | 1.4 | Subunit 8 of ubiquinol cytochrome-c reductase complex                 |
| YKL148C   | SDH1   | 1.6 | Flavoprotein subunit of succinate dehydrogenase                       |
| YDR231C   | COX20  | 1.7 | Mitochondrial inner membrane protein                                  |
| YDL130W-a | STF1   | 1.8 | Protein involved in regulation of the mitochondrial F1F0-ATP synthase |
| YGR008C   | STF2   | 3.0 | Protein involved in regulation of the mitochondrial F1F0-ATP synthase |

**CELL CYCLE AND DNA PROCESSING**

## Cell Cycle

|           |      |      |                                                                                         |
|-----------|------|------|-----------------------------------------------------------------------------------------|
| YBR233W-a | DAD3 | 1.7  | Essential subunit of the Dam1 complex                                                   |
| YDR022C   | CIS1 | 1.5  | Autophagy-specific protein required for autophagosome formation                         |
| YHR071W   | PCL5 | -2.2 | Cyclin, interacts with and phosphorylated by Pho85p cyclin-dependent kinase (Cdk)       |
| YJL141C   | YAK1 | 1.4  | Serine-threonine protein kinase                                                         |
| YKL161C   | KDX1 | 1.6  | Protein kinase implicated in the Slf2p mitogen-activated (MAP) kinase signaling pathway |

**TRANSCRIPTION**

## RNA synthesis

|           |        |      |                                                                    |
|-----------|--------|------|--------------------------------------------------------------------|
| YBL054W   | TOD6   | -1.5 | PAC motif binding protein involved in rRNA and ribosome biogenesis |
| YOR298C-a | MBF1   | 2.0  | Transcriptional coactivator                                        |
| YOR341W   | RPA190 | -1.5 | RNA polymerase I largest subunit A190                              |
| YPR010C   | RPA135 | -1.4 | RNA polymerase I second largest subunit A135                       |

**RNA processing and modification**

|         |      |     |                                                      |
|---------|------|-----|------------------------------------------------------|
| YDL048C | STP4 | 1.9 | Protein containing a Kruppel-type zinc-finger domain |
| YML091C | RPM2 | 1.6 | Protein subunit of mitochondrial RNase P             |

|         |       |      |                                                                                                      |
|---------|-------|------|------------------------------------------------------------------------------------------------------|
| YPL123C | RNY1  | 1.6  | Vacuolar RNase of the T(2) family                                                                    |
| YNL119W | NCS2  | -1.5 | Protein required for thiolation of the uridine at the wobble position of Lys(UUU) and Glu(UUC) tRNAs |
| YDL112W | TRM3  | -1.5 | 2'-O-ribose methyltransferase                                                                        |
| YNR015W | SMM1  | -1.5 | Dihydrouridine synthase                                                                              |
| YOL124C | TRM11 | -1.6 | Catalytic subunit of an adoMet-dependent tRNA methyltransferase complex                              |
| YPL207W | TYW1  | 2.0  | Protein required for the synthesis of wybutosine                                                     |

## PROTEIN SYNTHESIS

### Ribosome biogenesis and rRNA processing

|         |       |      |                                                                                                              |
|---------|-------|------|--------------------------------------------------------------------------------------------------------------|
| YAL059W | ECM1  | -1.5 | Pre-ribosomal factor involved in 60S ribosomal protein subunit export                                        |
| YBR142W | MAK5  | -1.7 | Essential nucleolar protein                                                                                  |
| YDL031W | DBP10 | -1.8 | Putative ATP-dependent RNA helicase of the DEAD-box protein family                                           |
| YDL060W | TSR1  | -1.5 | Protein required for processing of 20S pre-rRNA in the cytoplasm                                             |
| YDL148C | NOP14 | -1.4 | Nucleolar protein                                                                                            |
| YDR060W | MAK21 | -1.5 | Constituent of 66S pre-ribosomal particles                                                                   |
| YDR101C | ARX1  | -1.5 | Shuttling pre-60S factor                                                                                     |
| YER006W | NUG1  | -1.4 | GTPase that associates with nuclear 60S pre-ribosomes                                                        |
| YGL029W | CGR1  | -1.6 | Protein involved in nucleolar integrity and processing of the pre-rRNA for the 60S ribosome subunit          |
| YGL078C | DBP3  | -1.5 | Putative ATP-dependent RNA helicase                                                                          |
| YGR103W | NOP7  | -1.7 | Component of several different pre-ribosomal particles                                                       |
| YGR159C | NSR1  | -1.4 | Nucleolar protein that binds nuclear localization sequences                                                  |
| YHR066W | SSF1  | -1.5 | Constituent of 66S pre-ribosomal particles                                                                   |
| YHR197W | RIX1  | -1.7 | Essential component of the Rix1 complex                                                                      |
| YKL078W | DHR2  | -1.7 | Predominantly nucleolar DEAH-box ATP-dependent RNA helicase                                                  |
| YKR081C | RPF2  | -1.7 | Essential protein involved in the processing of pre-rRNA and the assembly of the 60S ribosomal subunit       |
| YMR128W | ECM16 | -1.8 | Essential DEAH-box ATP-dependent RNA helicase                                                                |
| YNL002C | RLP7  | -1.4 | Nucleolar protein with similarity to large ribosomal subunit L7 proteins                                     |
| YOR294W | RRS1  | -1.7 | Protein that binds ribosomal protein L11 and is required for nuclear export of the 60S pre-ribosomal subunit |
| YPL012W | RRP12 | -1.8 | Protein required for export of the ribosomal subunits                                                        |
| YPL093W | NOG1  | -1.7 | Putative GTPase that associates with free 60S ribosomal subunits in the nucleolus                            |
| YOR056C | NOB1  | -1.5 | Essential nuclear protein involved in proteasome maturation and synthesis of 40S ribosomal subunits          |
| YHR052W | CIC1  | -1.7 | Essential protein that interacts with proteasome components                                                  |
| YPL217C | BMS1  | -1.8 | GTPase required for synthesis of 40S ribosomal subunits and for processing the 35S pre-rRNA                  |
| YLR336C | SGD1  | -1.5 | Essential nuclear protein, required for biogenesis of the small ribosomal subunit                            |
| YOL041C | NOP12 | -1.4 | Nucleolar protein involved in pre-25S rRNA processing and biogenesis of large 60S ribosomal subunit          |
| YMR269W | TMA23 | -1.8 | Nucleolar protein implicated in ribosome biogenesis                                                          |
| YKL082C | RRP14 | -1.4 | Essential protein, constituent of 66S pre-ribosomal particles                                                |

|         |       |      |                                                                                                        |
|---------|-------|------|--------------------------------------------------------------------------------------------------------|
| YLR196W | PWP1  | -1.7 | Protein involved in rRNA processing                                                                    |
| YBL004W | UTP20 | -1.6 | Component of the small-subunit (SSU) processome                                                        |
| YBR247C | ENP1  | -1.8 | Protein associated with U3 and U14 snoRNAs                                                             |
| YCL054W | SPB1  | -1.6 | AdoMet-dependent methyltransferase involved in rRNA processing and 60S ribosomal subunit maturation    |
| YCR057C | PWP2  | -1.6 | Conserved 90S pre-ribosomal component essential for proper endonucleolytic cleavage of the 35 S rRNA   |
| YDL153C | SAS10 | -1.6 | Essential subunit of U3-containing Small Subunit (SSU) processome complex                              |
| YGR128C | UTP8  | -1.5 | Nucleolar protein required for export of tRNAs from the nucleus                                        |
| YGR145W | ENP2  | -1.7 | Essential nucleolar protein, required for biogenesis of the small ribosomal subunit                    |
| YGR280C | PXR1  | -1.6 | Essential protein involved in rRNA and snoRNA maturation                                               |
| YIL019W | FAF1  | -1.6 | Protein required for pre-rRNA processing and 40S ribosomal subunit assembly                            |
| YJL033W | HCA4  | -2.0 | Putative nucleolar DEAD box RNA helicase                                                               |
| YJL050W | MTR4  | -1.6 | ATP-dependent 3'-5' RNA helicase of the Dead-box family                                                |
| YLR002C | NOC3  | -1.6 | Protein that forms a nuclear complex with Noc2p                                                        |
| YLR129W | DIP2  | -1.7 | Nucleolar protein, specifically associated with the U3 snoRNA                                          |
| YMR229C | RRP5  | -1.5 | RNA binding protein                                                                                    |
| YMR290C | HAS1  | -1.5 | ATP-dependent RNA helicase                                                                             |
| YPL043W | NOP4  | -1.6 | Nucleolar protein, essential for processing and maturation of 27S pre-rRNA and large ribosomal subunit |
| YPL266W | DIM1  | -1.5 | Essential 18S rRNA dimethylase (dimethyladenosine transferase)                                         |
| YPR112C | MRD1  | -1.9 | Essential conserved protein that is part of the 90S preribosome                                        |
| YGL120C | PRP43 | -1.6 | RNA helicase in the DEAH-box family                                                                    |

## **PROTEIN FATE (folding, modification, destination)**

### **Protein/peptide degradation**

|         |       |     |                                                                                                       |
|---------|-------|-----|-------------------------------------------------------------------------------------------------------|
| YEL012W | UBC8  | 1.8 | Ubiquitin-conjugating enzyme that negatively regulates gluconeogenesis                                |
| YHR138C |       | 1.9 | Putative protein of unknown function                                                                  |
| YHR171W | ATG7  | 1.5 | Autophagy-related protein and dual specificity member of the E1 family of ubiquitin-activating enzyme |
| YBL101C | ECM21 | 1.5 | Protein involved in regulating the endocytosis of plasma membrane proteins                            |
| YPL003W | ULA1  | 1.5 | Protein that acts together with Uba3p to activate Rub1p before its conjugation to proteins            |
| YJL048C | UBX6  | 1.7 | UBX (ubiquitin regulatory X) domain-containing protein that interacts with Cdc48p                     |

### **TRANSPORT**

#### **Protein transport**

|         |        |     |                                                                                                       |
|---------|--------|-----|-------------------------------------------------------------------------------------------------------|
| YGR142W | BTN2   | 2.3 | v-SNARE binding protein that facilitates specific protein retrieval from a late endosome to the Golgi |
| YNL036W | NCE103 | 1.7 | Carbonic anhydrase                                                                                    |

#### **Transmembrane transport**

|         |      |      |                                                                |
|---------|------|------|----------------------------------------------------------------|
| YDL054C | MCH1 | -1.6 | Protein with similarity to mammalian monocarboxylate permeases |
| YIL121W | QDR2 | 1.7  | Multidrug transporter of the major facilitator superfamily     |
| YDR497C | ITR1 | 1.7  | Myo-inositol transporter                                       |

|         |      |      |                                                                        |
|---------|------|------|------------------------------------------------------------------------|
| YKR039W | GAP1 | 1.9  | General amino acid permease                                            |
| YBR132C | AGP2 | 2.1  | High affinity polyamine permease                                       |
| YMR011W | HXT2 | -1.6 | High-affinity glucose transporter of the major facilitator superfamily |

#### **Mitochondrial transport**

|         |      |      |                                                                                                      |
|---------|------|------|------------------------------------------------------------------------------------------------------|
| YBR104W | YMC2 | -1.5 | Putative mitochondrial inner membrane transporter with a role in oleate metabolism and glutamate bic |
|---------|------|------|------------------------------------------------------------------------------------------------------|

#### **CELLULAR COMMUNICATION/SIGNAL TRANSDUCTION MECHANISM**

##### Cellular signalling

|         |      |     |                                                 |
|---------|------|-----|-------------------------------------------------|
| YGR136W | LSB1 | 1.5 | Protein containing an N-terminal SH3 domain     |
| YJL164C | TPK1 | 2.1 | cAMP-dependent protein kinase catalytic subunit |
| YOL016C | CMK2 | 1.6 | Calmodulin-dependent protein kinase             |

#### **CELL RESCUE, DEFENSE AND VIRULENCE**

##### **Stress response**

|           |       |      |                                                                                                    |
|-----------|-------|------|----------------------------------------------------------------------------------------------------|
| YBR155W   | CNS1  | -1.6 | TPR-containing co-chaperone                                                                        |
| YBR169C   | SSE2  | 1.7  | Member of the heat shock protein 70 (HSP70) family                                                 |
| YDL022W   | GPD1  | 1.8  | NAD-dependent glycerol-3-phosphate dehydrogenase                                                   |
| YDR171W   | HSP42 | 2.8  | Small heat shock protein (sHSP) with chaperone activity                                            |
| YDR258C   | HSP78 | 2.0  | Oligomeric mitochondrial matrix chaperone                                                          |
| YDR513W   | GRX2  | 1.4  | Cytoplasmic glutaredoxin                                                                           |
| YGR088W   | CTT1  | 2.5  | Cytosolic catalase T                                                                               |
| YHR030C   | SLT2  | 1.5  | Serine/threonine MAP kinase                                                                        |
| YIL113W   | SDP1  | 1.5  | Stress-inducible dual-specificity MAP kinase phosphatase,                                          |
| YKL062W   | MSN4  | 1.5  | Transcriptional activator related to Msn2p                                                         |
| YKR092C   | SRP40 | -1.5 | Nucleolar, protein that may function as a chaperone of small nucleolar ribonucleoprotein particles |
| YML100W   | TSL1  | 3.0  | Large subunit of trehalose 6-phosphate synthase (Tps1p)/phosphatase (Tps2p) complex                |
| YNL007C   | SIS1  | 1.8  | Type II HSP40 co-chaperone that interacts with the HSP70 protein Ssa1p                             |
| YNL160W   | YGP1  | 2.0  | Cell wall-related secretory glycoprotein                                                           |
| YOL052C-a | DDR2  | 3.7  | Multistress response protein                                                                       |
| YPL004C   | LSP1  | 1.6  | Primary component of eisosomes                                                                     |

#### **INTERACTION WITH THE ENVIRONMENT**

##### **Metal homeostasis**

##### **Iron metabolism**

|         |      |      |                                                                          |
|---------|------|------|--------------------------------------------------------------------------|
| YER174C | GRX4 | 3.7  | Monothiol glutaredoxin                                                   |
| YER145C | FTR1 | -3.3 | High affinity iron permease                                              |
| YLL027W | ISA1 | 1.5  | Protein involved in biogenesis of iron-sulfur protein assembly machinery |
| YLR034C | SMF3 | -1.4 | NRAMP homolog Fe transporter                                             |
| YLR220W | CCC1 | 2.7  | Transporter that mediates vacuolar Fe storage                            |

|         |      |      |                                                                   |
|---------|------|------|-------------------------------------------------------------------|
| YMR058W | FET3 | -6.9 | Multicopper oxidase required for high-affinity Fe uptake          |
| YNL240C | NAR1 | -1.4 | Component of the cytosolic iron-sulfur protein assembly machinery |

#### **Copper metabolism**

|         |        |      |                                                         |
|---------|--------|------|---------------------------------------------------------|
| YPR124W | CTR1   | -1.5 | High-affinity copper transporter of the plasma membrane |
| YHR053C | CUP1-1 | 3.9  | Copper binding metallothionein                          |
| YHR055C | CUP1-2 | 4.1  | Copper binding metallothionein                          |

#### **Zinc metabolism**

|         |      |      |                                                   |
|---------|------|------|---------------------------------------------------|
| YOL101C | IZH4 | -1.9 | Membrane protein involved in zinc ion homeostasis |
|---------|------|------|---------------------------------------------------|

#### **Calcium homeostasis**

|         |      |     |                                                                                         |
|---------|------|-----|-----------------------------------------------------------------------------------------|
| YGL006W | PMC1 | 1.5 | Vacuolar Ca <sup>2+</sup> ATPase involved in depleting cytosol of Ca <sup>2+</sup> ions |
|---------|------|-----|-----------------------------------------------------------------------------------------|

### **BIOGENESIS OF CELLULAR COMPONENTS**

#### **Cell wall**

|         |       |     |                                                                                |
|---------|-------|-----|--------------------------------------------------------------------------------|
| YDL222C | FMP45 | 1.7 | Integral membrane protein localized to mitochondria                            |
| YHR142W | CHS7  | 1.4 | Protein involved in chitin biosynthesis by regulating Chs3p export from the ER |
| YJR106W | ECM27 | 1.5 | Putative protein that may play a role in cell wall biosynthesis                |
| YKL096W | CWP1  | 1.9 | Cell wall mannoprotein                                                         |

#### **UNKNOWN FUNCTION**

|           |       |      |                                      |
|-----------|-------|------|--------------------------------------|
| YKR046C   | PET10 | 1.4  | Putative protein of unknown function |
| YIR030C   | DCG1  | 1.9  | Putative protein of unknown function |
| YLR327C   | TMA10 | 2.2  | Putative protein of unknown function |
| YBR054W   | YRO2  | 1.6  | Putative protein of unknown function |
| YAR027W   | UIP3  | 1.6  | Putative protein of unknown function |
| YBL029C-a |       | 1.4  | Putative protein of unknown function |
| YCR016W   |       | -1.5 | Putative protein of unknown function |
| YDL110C   | TMA17 | 1.8  | Putative protein of unknown function |
| YDL159W-a |       | 1.8  | Putative protein of unknown function |
| YDL204W   | RTN2  | 2.3  | Putative protein of unknown function |
| YDR379C-a |       | 1.6  | Putative protein of unknown function |
| YDR391C   |       | 1.5  | Putative protein of unknown function |
| YER067W   | RG11  | 1.9  | Putative protein of unknown function |
| YER137C   |       | -1.6 | Putative protein of unknown function |
| YHL021C   | AIM17 | 2.1  | Putative protein of unknown function |
| YHR087W   | RTC3  | 3.2  | Putative protein of unknown function |
| YIL024C   |       | 1.5  | Putative protein of unknown function |
| YIL096C   |       | -1.4 | Putative protein of unknown function |
| YJL016W   |       | 1.4  | Putative protein of unknown function |

|                                 |       |      |                                                                                                                  |
|---------------------------------|-------|------|------------------------------------------------------------------------------------------------------------------|
| YJL163C                         |       | 1.6  | Putative protein of unknown function                                                                             |
| YJR008W                         |       | 1.7  | Putative protein of unknown function                                                                             |
| YKL091C                         |       | 1.6  | Putative protein of unknown function                                                                             |
| YLR363W-a                       |       | -1.6 | Putative protein of unknown function                                                                             |
| YLR413W                         |       | -1.9 | Putative protein of unknown function                                                                             |
| YPL068C                         |       | -1.4 | Putative protein of unknown function                                                                             |
| YPR158W                         | CUR1  | 2.0  | Putative protein of unknown function                                                                             |
| <b>OTHERS OF KNOWN FUNCTION</b> |       |      |                                                                                                                  |
| YDL021W                         | GPM2  | 1.6  | Homolog of Gpm1p phosphoglycerate mutase                                                                         |
| YLR063W                         |       | -1.5 | Putative S-adenosylmethionine-dependent methyltransferase                                                        |
| YER037W                         | PHM8  | 1.7  | Lysophosphatidic acid (LPA) phosphatase                                                                          |
| YNL124W                         | NAF1  | -1.6 | RNA-binding protein                                                                                              |
| YHR146W                         | CRP1  | -1.4 | Protein that binds to cruciform DNA structures                                                                   |
| YJR004C                         | SAG1  | 1.4  | Alpha-agglutinin of alpha-cells                                                                                  |
| YGL037C                         | PNC1  | 2.0  | Nicotinamidase that converts nicotinamide to nicotinic acid                                                      |
| YGL053W                         | PRM8  | 1.7  | Pheromone-regulated protein                                                                                      |
| YAL019W                         | FUN30 | -1.5 | Conserved member of the Snf2p family with ATP-dependent chromatin remodeling activity                            |
| YDL239C                         | ADY3  | 1.5  | Protein required for spore wall formation                                                                        |
| YDR085C                         | AFR1  | 1.8  | Protein required for pheromone-induced projection (shmoo) formation                                              |
| YDR516C                         | EMI2  | 1.8  | Non-essential protein required for transcriptional induction of the early meiotic-specific transcription factors |
| YMR014W                         | BUD22 | -1.7 | Protein required for 18S rRNA maturation and small ribosomal subunit biogenesis                                  |
| YDR361C                         | BCP1  | -1.6 | Essential protein involved in nuclear export of Mss4p                                                            |
| YOR173W                         | DCS2  | 2.0  | Non-essential, stress induced regulatory protein                                                                 |
| YPR175W                         | DPB2  | -1.5 | Second largest subunit of DNA polymerase II (DNA polymerase epsilon)                                             |
| YGR248W                         | SOL4  | 2.1  | 6-phosphogluconolactonase with similarity to Sol3p                                                               |

---
