# Supplementary material for: The Role of the Yap5 Transcription Factor in Remodeling Gene Expression in Response to Fe Bioavailability
Source: PLOS journal article supplement (doi:10.1371/journal.pone.0037434), 2012-05-16
Supplement: S2 (10.1371/journal.pone.0037434.s002) [file journal.pone.0037434.s002]

**Table S2.** Genes dependent on Yap5 whose steady-state levels are altered upon cells incubation with 2mM of FeSO<sub>4</sub> for 20 min

| Systematic Name                                          | Gene Name | Fold Change | Description                                                                           |
|----------------------------------------------------------|-----------|-------------|---------------------------------------------------------------------------------------|
| <b>CELL CYCLE AND DNA PROCESSING</b>                     |           |             |                                                                                       |
| <b>DNA processing</b>                                    |           |             |                                                                                       |
| YLR103c                                                  | CDC45     | -1.5        | DNA replication initiation factor                                                     |
| YDR386w                                                  | MUS81     | -1.4        | Subunit of the structure-specific Mms4p-Mus81p endonuclease that cleaves branched DNA |
| YOL017w                                                  | ESC8      | -1.4        | Protein involved in telomeric and mating-type locus silencing                         |
| YEL019c                                                  | MMS21     | -1.4        | Protein involved in DNA repair                                                        |
| YER116c                                                  | SLX8      | 1.4         | Subunit of the Slx5-Slx8 SUMO-targeted ubiquitin ligase (STUbL) complex               |
| YGL113w                                                  | SLD3      | 1.5         | Protein involved in the initiation of DNA replication                                 |
| YFR023w                                                  | PES4      | 1.5         | Poly(A) binding protein                                                               |
| Cell cycle                                               |           |             |                                                                                       |
| YDR168w                                                  | CDC37     | -1.4        | Essential Hsp90p co-chaperone                                                         |
| YLR079w                                                  | SIC1      | 1.6         | Inhibitor of Cdc28-Clb kinase complexes that controls G1/S phase transition           |
| YOR195w                                                  | SLK19     | 1.7         | Kinetochore-associated protein                                                        |
| <b>TRANSCRIPTION</b>                                     |           |             |                                                                                       |
| RNA synthesis                                            |           |             |                                                                                       |
| YGR097w                                                  | ASK10     | 1.6         | Component of RNA polymerase II holoenzyme                                             |
| YGL043w                                                  | DST1      | -1.4        | General transcription elongation factor TFIIS                                         |
| YOL042w                                                  | NGL1      | -1.4        | Putative endonuclease                                                                 |
| <b>RNA processing</b>                                    |           |             |                                                                                       |
| YCR073w-a                                                | SOL2      | 1.6         | Protein with a possible role in tRNA export                                           |
| YNL282w                                                  | POP3      | 1.5         | Subunit of both RNase MRP and nuclear RNase P                                         |
| <b>PROTEIN SYNTHESIS</b>                                 |           |             |                                                                                       |
| YBL080c                                                  | PET112    | -1.8        | Subunit of the trimeric GatFAB AmidoTransferase(AdT) complex                          |
| YLR067c                                                  | PET309    | -1.6        | Specific translational activator for the COX1 mRNA                                    |
| YLR289w                                                  | GUF1      | -1.5        | Mitochondrial matrix GTPase                                                           |
| <b>PROTEIN FATE (folding, modification, destination)</b> |           |             |                                                                                       |
| <b>Protein/peptide degradation</b>                       |           |             |                                                                                       |
| YMR119w                                                  | ASI1      | -1.7        | Putative integral membrane E3 ubiquitin ligase                                        |
| YJR062c                                                  | NTA1      | 1.5         | Amidase                                                                               |
| YIL030c                                                  | SSM4      | 2.1         | Ubiquitin-protein ligase involved in ER-associated protein degradation                |
| <b>CELL RESCUE, DEFENSE AND VIRULENCE</b>                |           |             |                                                                                       |

**Stress response**

|         |      |      |                                              |
|---------|------|------|----------------------------------------------|
| YMR140w | SIP5 | -1.7 | Protein of unknown function                  |
| YOR386w | PHR1 | -1.5 | DNA photolyase involved in photoreactivation |
| YER118c | SHO1 | 1.5  | Transmembrane osmosensor                     |
| YFL016c | MDJ1 | 1.6  | Co-chaperone                                 |

**INTERACTION WITH THE ENVIRONMENT****Metal homeostasis**

|         |      |      |                                               |
|---------|------|------|-----------------------------------------------|
| YLR220w | CCC1 | -2.9 | Transporter that mediates vacuolar Fe storage |
| YER174c | GRX4 | -2.7 | Monothiol glutaredoxin                        |

**UNKNOWN FUNCTION**

|           |       |      |                                                                                                  |
|-----------|-------|------|--------------------------------------------------------------------------------------------------|
| YGR126w   |       | -1.5 | Putative protein of unknown function                                                             |
| YHR131c   |       | 1.4  | Putative protein of unknown function                                                             |
| YNL295w   |       | 1.4  | Putative protein of unknown function                                                             |
| YOR019w   |       | 1.4  | Protein of unknown function that may interact with ribosomes                                     |
| YLR346c   |       | 1.5  | Putative protein of unknown function found in mitochondria                                       |
| YBR032w   |       | 1.5  | Dubious open reading frame                                                                       |
| YGR168c   |       | 1.5  | Putative protein of unknown function                                                             |
| YFL067w   |       | 1.5  | Protein of unknown function, down-regulated at low calcium levels                                |
| YJL055w   |       | 1.6  | Putative protein of unknown function                                                             |
| YBR150c   | TBS1  | 1.8  | Putative protein of unknown function                                                             |
| YLR190w   | MMR1  | 1.9  | Phosphorylated protein of the mitochondrial outer membrane,                                      |
| YDR381c-a |       | 2.2  | Protein of unknown function, localized to the mitochondrial outer membrane                       |
| YER007c-a | TMA20 | 1.6  | Protein of unknown function that associates with ribosomes and has a putative RNA binding domain |

**OTHERS OF KNOWN FUNCTION**

|           |      |      |                                                                                               |
|-----------|------|------|-----------------------------------------------------------------------------------------------|
| YNR059w   | MNT4 | -1.7 | Putative alpha-1,3-mannosyltransferase                                                        |
| YIL082w-a |      | 1.4  | Retrotransposon TYA Gag and TYB Pol genes                                                     |
| YBL088c   | TEL1 | 1.5  | Protein kinase primarily involved in telomere length regulation                               |
| YDL214c   | PRR2 | 1.5  | Serine/threonine protein kinase that inhibits pheromone induced signalling downstream of MAPK |
| YOR255w   | OSW1 | 1.5  | Protein involved in sporulation                                                               |

**amino acid metabolism**

|         |      |      |                            |
|---------|------|------|----------------------------|
| YOL058w | ARG1 | -1.6 | Arginosuccinate synthetase |
|---------|------|------|----------------------------|

**nucleotide/nucleoside/nucleobase metabolism**

|         |       |      |                                                           |
|---------|-------|------|-----------------------------------------------------------|
| YMR271c | URA10 | -1.5 | Minor orotate phosphoribosyltransferase (OPRTase) isozyme |
|---------|-------|------|-----------------------------------------------------------|

**C-compound and carbohydrate metabolism**

|         |      |      |                                     |
|---------|------|------|-------------------------------------|
| YJL153c | INO1 | -2.9 | L-myo-inositol-1-phosphate synthase |
|---------|------|------|-------------------------------------|

**lipid, fatty acid and isoprenoid metabolism**

|         |        |     |                                                    |
|---------|--------|-----|----------------------------------------------------|
| YPL148c | PPT2   | 1.7 | Phosphopantetheine:protein transferase (PPTase)    |
| YBL042c | FUI1   | 1.5 | High affinity uridine permease                     |
| YER105c | NUP157 | 1.8 | Abundant subunit of the nuclear pore complex (NPC) |

---
