# Supplementary material for: The Role of the Yap5 Transcription Factor in Remodeling Gene Expression in Response to Fe Bioavailability
Source: PLOS journal article supplement (doi:10.1371/journal.pone.0037434), 2012-05-16
Supplement: S3 (10.1371/journal.pone.0037434.s003) [file journal.pone.0037434.s003]

**Table S3.** Genes dependent on Yap5 whose steady-state levels are altered upon cells incubation with 2mM of FeSO<sub>4</sub> for 60 min

---

| Systematic Name | Gene Name | Fold Change | Description |
|-----------------|-----------|-------------|-------------|
|-----------------|-----------|-------------|-------------|

---

**METABOLISM****C-Compound and Carbohydrate metabolism**

|         |      |      |                                                         |
|---------|------|------|---------------------------------------------------------|
| YGR087C | PDC6 | -2.7 | Pyruvate decarboxylase isozyme                          |
| YOR178C | GAC1 | -2.1 | Regulatory subunit for Glc7p type-1 protein phosphatase |
| YJL153C | INO1 | -1.7 | L-myo-inositol-1-phosphate synthase                     |
| YGL256W | ADH4 | 1.5  | Alcohol dehydrogenase isoenzyme IV                      |
| YGL035C | MIG1 | 1.5  | Transcription factor involved in glucose repression     |

**Lipid, fatty acid and isoprenoid metabolism**

|           |       |      |                                                                                 |
|-----------|-------|------|---------------------------------------------------------------------------------|
| YBR058C-A | TSC3  | -2.4 | Protein involved in sphingolipid biosynthesis                                   |
| YMR101C   | SRT1  | -2.3 | Cis-prenyltransferase involved in synthesis of long-chain dolichols             |
| YDR018C   |       | -1.8 | Protein similar to 1-acyl-glycerol-3-phosphate acyltransferase                  |
| YDR287W   | INM2  | -1.8 | Inositol monophosphatase                                                        |
| YGL055W   | OLE1  | -1.7 | Delta-9-fatty acid desaturase                                                   |
| YGL205W   | POX1  | -1.5 | Fatty-acyl coenzyme A oxidase                                                   |
| YBR042C   | CST26 | 1.4  | Protein required for incorporation of stearic acid into phosphatidylinositol    |
| YJL091C   | GWT1  | 1.6  | Protein involved in the inositol acylation of glucosaminyl phosphatidylinositol |

**RESPIRATION**

|         |       |      |                                                                                            |
|---------|-------|------|--------------------------------------------------------------------------------------------|
| Q0275   | COX3  | -3.5 | Cytochrome c oxidase subunit III                                                           |
| Q0050   | AI1   | -2.3 | Reverse transcriptase required for splicing of the COX1 pre-mRNA                           |
| Q0080   | ATP8  | -2.2 | ATP synthase subunit 8                                                                     |
| YJL045W |       | -2.2 | Minor succinate dehydrogenase isozyme                                                      |
| YLR201C | COQ9  | 1.4  | Protein required for ubiquinone biosynthesis and respiratory growth                        |
| YML129C | COX14 | 1.4  | Protein involved in translational regulation of Cox1p and assembly of cytochrome c oxidase |

**CELL CYCLE AND DNA PROCESSING****DNA processing**

|         |       |      |                                                       |
|---------|-------|------|-------------------------------------------------------|
| YBR098W | MMS4  | -2.3 | Endonuclease that cleaves branched DNA                |
| YEL019C | MMS21 | -1.8 | Protein involved in DNA repair                        |
| YPR164W | MMS1  | -1.6 | Subunit of an E3 ubiquitin ligase complex             |
| YBR060C | ORC2  | 1.4  | Subunit of the origin recognition complex             |
| YLR247C | IRC20 | 1.4  | Putative helicase                                     |
| YGL113W | SLD3  | 1.5  | Protein involved in the initiation of DNA replication |

|                       |        |      |                                                                            |
|-----------------------|--------|------|----------------------------------------------------------------------------|
| YLR135W               | SLX4   | 1.6  | Endonuclease involved in processing DNA during recombination and repair    |
| YML062C               | MFT1   | 1.7  | Subunit of the THO complex                                                 |
| <b>Cell Cycle</b>     |        |      |                                                                            |
| YKL089W               | MIF2   | -3.1 | Kinetochore protein with homology to human                                 |
| YER111C               | SWI4   | -2.6 | DNA binding component of the SBF complex (Swi4p-Swi6p)                     |
| YBR107C               | IML3   | -2.6 | Protein with a role in kinetochore function                                |
| YBL097W               | BRN1   | -2.1 | Subunit of the condensin complex                                           |
| YER018C               | SPC25  | -2.0 | Component of the kinetochore-associated Ndc80 complex                      |
| YER106W               | MAM1   | -2.0 | Monopolin                                                                  |
| YDR446W               | ECM11  | -2.0 | Non-essential protein apparently involved in meiosis                       |
| YIL073C               | SPO22  | -1.9 | Meiosis-specific protein essential for chromosome synapsis                 |
| YOR349W               | CIN1   | -1.8 | Tubulin folding factor D involved in beta-tubulin folding                  |
| YNL188W               | KAR1   | -1.7 | Essential protein involved in spindle pole body duplication during mitosis |
| YBR186W               | PCH2   | -1.6 | Nucleolar component of the pachytene checkpoint                            |
| YPL121C               | MEI5   | -1.6 | Meiosis specific protein                                                   |
| YIR025W               | MND2   | -1.6 | Subunit of the anaphase-promoting complex (APC)                            |
| YLR329W               | REC102 | -1.6 | Protein involved in early stages of meiotic recombination                  |
| YOR177C               | MPC54  | -1.6 | Component of the meiotic outer plaque                                      |
| YFR027W               | ECO1   | -1.4 | Acetyltransferase required for establishment of sister chromatid cohesion  |
| YDL008W               | APC11  | 1.4  | Catalytic core subunit of the Anaphase-Promoting Complex/Cyclosome (APC/C) |
| YIL144W               | TID3   | 1.5  | Component of the kinetochore-associated Ndc80 complex                      |
| YML104C               | MDM1   | 1.6  | Intermediate filament protein                                              |
| YBR215W               | HPC2   | 1.7  | Subunit of the HIR nucleosome assembly complex                             |
| YLR212C               | TUB4   | 1.8  | Gamma tubulin                                                              |
| YJL106W               | IME2   | 2.1  | erine/threonine protein kinase involved in activation of meiosis           |
| <b>TRANSCRIPTION</b>  |        |      |                                                                            |
| <b>RNA processing</b> |        |      |                                                                            |
| YKL095W               | YJU2   | -3.3 | Essential protein required for pre-mRNA splicing                           |
| YKR060W               | UTP30  | -3.0 | Subunit of U3-containing 90S preribosome complex                           |
| Q0255                 |        | -2.3 | Maturase-like protein                                                      |
| YBL074C               | AAR2   | -2.2 | Component of the U5 snRNP                                                  |
| Q0120                 | BI4    | -2.0 | Mitochondrial mRNA maturase                                                |
| YNL282W               | POP3   | -1.6 | Subunit of both RNase MRP and nuclear RNase P                              |
| YPR072W               | NOT5   | 1.4  | Subunit of the CCR4-NOT complex                                            |
| YPR042C               | PUF2   | 1.5  | mRNA binding protein                                                       |
| YJL203W               | PRP21  | 1.6  | Subunit of the SF3a splicing factor complex                                |

|         |      |     |                                                                                           |
|---------|------|-----|-------------------------------------------------------------------------------------------|
| YFR005C | SAD1 | 1.7 | Conserved zinc-finger domain protein involved in pre-mRNA splicing                        |
| YKR002W | PAP1 | 1.7 | Poly(A) polymerase                                                                        |
| YHL038C | CBP2 | 2.0 | Mitochondrial protein required for splicing of the group I intron al5 of the COB pre-mRNA |

## **PROTEIN FATE (folding, modifiCation, destination)**

### **Protein/peptide degradation**

|         |       |      |                                                                                                      |
|---------|-------|------|------------------------------------------------------------------------------------------------------|
| YOL141W | PPM2  | -3.6 | tRNA methyltransferase also involved in methoxycarbonylation and equired for the synthesis of wybutc |
| YHR160C | PEX18 | -2.9 | Peroxin required for targeting of peroxisomal matrix proteins containing PTS2                        |
| YKL171W | NNK1  | -2.0 | Protein kinase implicated in proteasome function                                                     |
| YDL008W | APC11 | 1.4  | Catalytic core subunit of the Anaphase-Promoting Complex/Cyclosome (APC/C)                           |
| YDR425W | SNX41 | 1.5  | Sorting nexin                                                                                        |
| YOR297C | TIM18 | 1.6  | Component of the mitochondrial TIM22 complex                                                         |
| YFR003C | YPI1  | 1.6  | Inhibitor of the type I protein phosphatase Glc7p                                                    |
| YOL013C | HRD1  | 1.6  | Ubiquitin-protein ligase required for endoplasmic reticulum-associated degradation                   |
| YDR069C | DOA4  | 1.9  | Ubiquitin isopeptidase                                                                               |

### **TRANSPORT**

|         |       |      |                                                                                     |
|---------|-------|------|-------------------------------------------------------------------------------------|
| YNL253W | TEX1  | -2.9 | Protein involved in mRNA export                                                     |
| YCR010C | ADY2  | -2.4 | Acetate transporter required for normal sporulation                                 |
| YAL067C | SEO1  | -2.4 | Putative permease                                                                   |
| YNL318C | HXT14 | -2.0 | Protein with similarity to hexose transporter family members                        |
| YFL011W | HXT10 | -1.6 | Putative hexose transporter                                                         |
| YLL052C | AQY2  | -1.6 | Water channel that mediates the transport of water across cell membranes            |
| YGR009C | SEC9  | 1.4  | t-SNARE protein important for fusion of secretory vesicles with the plasma membrane |
| YER119C | AVT6  | 1.4  | Vacuolar aspartate and glutamate exporte                                            |
| YNL051W | COG5  | 1.5  | Component of the oligomeric Golgi complex that functions in protein trafficking     |
| YBR080C | SEC18 | 1.5  | ATPase required for vesicular transport between ER and Golgi                        |
| YPL265W | DIP5  | 1.5  | Dicarboxylic amino acid permease                                                    |
| YIL114C | POR2  | 1.6  | Putative mitochondrial porin                                                        |
| YJR005W | APL1  | 1.7  | Beta-adaptin involved in vesicle mediated transport;                                |
| YDR406W | PDR15 | 2.1  | Plasma membrane ATP binding cassette (ABC) transporter, multidrug transporter       |

## **CELL RESCUE, DEFENSE AND VIRULENCE**

### **Stress response**

|         |       |      |                                                                                            |
|---------|-------|------|--------------------------------------------------------------------------------------------|
| YFL014W | HSP12 | -1.4 | Plasma membrane protein involved in maintaining membrane organization in stress conditions |
| YFL031W | HAC1  | -1.4 | Transcription factor that regulates the unfolded protein response                          |
| YIL113W | SDP1  | -1.5 | Stress-inducible dual-specificity MAP kinase phosphatase,                                  |
| YJL144W |       | -3.4 | Cytoplasmic hydrophilin with a role in dessication resistance                              |
| YGR154C | GTO1  | -2.4 | Omega-class glutathione transferase                                                        |

|                |       |      |                                                                            |
|----------------|-------|------|----------------------------------------------------------------------------|
| YOR178C        | GAC1  | -2.1 | Regulatory subunit for Glc7p type-1 protein phosphatase                    |
| YPL280W        | HSP32 | -1.6 | Possible chaperone and cysteine protease                                   |
| Detoxification |       |      |                                                                            |
| YGR138C        | TPO2  | -1.5 | Polyamine transport protein                                                |
| YPR156C        | TPO3  | -1.4 | Polyamine transport protein                                                |
| YBR008C        | FLR1  | 1.4  | Plasma membrane multidrug transporter of the major facilitator superfamily |
| YOR273C        | TPO4  | 1.6  | Polyamine transport protein                                                |

## INTERACTION WITH THE ENVIRONMENT

### Metal homeostasis

|         |      |      |                                                                                                 |
|---------|------|------|-------------------------------------------------------------------------------------------------|
| YOL152W | FRE7 | -2.6 | Putative ferric reductase with similarity to Fre2p with expression induced by low copper levels |
| YER174C | GRX4 | -1.9 | Monothiol glutaredoxin                                                                          |
| YLR220W | CCC1 | -1.7 | Transporter that mediates vacuolar Fe storage                                                   |
| YDR205W | MSC2 | 1.4  | Member of the cation diffusion facilitator family                                               |
| YPL207W | TYW1 | -1.5 | Protein required for the synthesis of wybutosine                                                |
| YCR044C | PER1 | 1.5  | Protein of the endoplasmic reticulum                                                            |
| YDR182W | CDC1 | 1.5  | Putative lipid phosphatase of the endoplasmic reticulum                                         |
| YMR058W | FET3 | 2.4  | Multicopper oxidase required for high-affinity Fe uptake                                        |

### UNKNOWN FUNCTION

|           |      |      |                                      |
|-----------|------|------|--------------------------------------|
| YLR162W   |      | -4.8 | Putative protein of unknown function |
| YAR066W   |      | -3.8 | Putative GPI protein                 |
| YBL059W   |      | -3.5 | Putative protein of unknown function |
| YHR112C   |      | -3.3 | Putative protein of unknown function |
| YPL077C   |      | -3.3 | Putative protein of unknown function |
| YMR084W   |      | -2.7 | Putative protein of unknown function |
| YMR317W   |      | -2.7 | Protein of unknown function          |
| YGR035C   |      | -2.7 | Putative protein of unknown function |
| YJL132W   |      | -2.6 | Putative protein of unknown function |
| YEL008W   |      | -2.5 | Hypothetical protein                 |
| YLR161W   |      | -2.2 | Putative protein of unknown function |
| YNL195C   |      | -2.2 | Putative protein of unknown function |
| YBR076W   | ECM8 | -2.1 | Protein of unknown function          |
| YLR281C   |      | -2.1 | Putative protein of unknown function |
| YLR281C   |      | -2.1 | Protein of unknown function          |
| YAL064C-A |      | -2.1 | Putative protein of unknown function |
| YPL205C   |      | -2.1 | Hypothetical protein                 |
| YJR120W   |      | -2.1 | Protein of unknown function          |

|                                 |       |      |                                                                                                      |
|---------------------------------|-------|------|------------------------------------------------------------------------------------------------------|
| YGR126W                         |       | -2.1 | Putative protein of unknown function                                                                 |
| YJL218W                         |       | -2.0 | Putative protein of unknown function                                                                 |
| YPL165C                         | SET6  | -2.0 | Protein of unknown function                                                                          |
| YGL258W-A                       |       | -1.9 | Putative protein of unknown function                                                                 |
| YJR108W                         | ABM1  | -1.9 | Protein of unknown function                                                                          |
| YMR265C                         |       | -1.8 | Putative protein of unknown function                                                                 |
| YBR033W                         | EDS1  | -1.8 | Putative zinc cluster protein                                                                        |
| YPR116W                         | RRG8  | -1.7 | Putative protein of unknown function                                                                 |
| YHR177W                         |       | -1.7 | Putative protein of unknown function                                                                 |
| YJL105W                         | SET4  | -1.7 | Protein of unknown function                                                                          |
| YMR018W                         |       | -1.7 | Putative protein of unknown function                                                                 |
| YJL038C                         | LOH1  | -1.6 | Putative protein of unknown function                                                                 |
| YNL095C                         |       | -1.5 | Putative protein of unknown function                                                                 |
| YGL117W                         |       | -1.5 | Putative protein of unknown function                                                                 |
| YHL045W                         |       | -1.5 | Putative protein of unknown function                                                                 |
| YCL058C                         | FYV5  | -1.4 | Protein of unknown function                                                                          |
| YHR126C                         | ANS1  | -1.4 | Putative protein of unknown function                                                                 |
| YJL131C                         | AIM23 | 1.4  | Putative protein of unknown function                                                                 |
| YML131W                         |       | 1.4  | Putative protein of unknown function                                                                 |
| YHR078W                         |       | 1.4  | High osmolarity-regulated gene of unknown function                                                   |
| YKR021W                         | ALY1  | 1.5  | Putative protein of unknown function                                                                 |
| YIL090W                         | ICE2  | 1.5  | Integral ER membrane protein                                                                         |
| YJL078C                         | PRY3  | 1.5  | Protein of unknown function                                                                          |
| YDR111C                         | ALT2  | 1.5  | Putative alanine transaminase                                                                        |
| YGL185C                         |       | 1.5  | Putative protein of unknown function                                                                 |
| YPL260W                         |       | 1.5  | Protein of unknown function                                                                          |
| YDR475C                         | JIP4  | 1.5  | Protein of unknown function                                                                          |
| YOL013W-A                       |       | 1.6  | Protein of unknown function                                                                          |
| YCR061W                         |       | 1.6  | Protein of unknown function                                                                          |
| YGL226W                         | MTC3  | 1.6  | Protein of unknown function                                                                          |
| YDR068W                         | DOS2  | 1.6  | Protein of unknown function                                                                          |
| YIL096C                         |       | 1.6  | Putative protein of unknown function                                                                 |
| <b>OTHERS OF KNOWN FUNCTION</b> |       |      |                                                                                                      |
| YMR025W                         | CSI1  | -3.2 | Subunit of the Cop9 signalosome                                                                      |
| YDR210W-A                       |       | -2.9 | Retrotransposon TYA Gag gene                                                                         |
| YNL230C                         | ELA1  | -2.8 | Elongin A, protein required for ubiquitin-dependent degradation of the RNA Polymerase II subunit RPC |

|           |       |      |                                                                                                  |
|-----------|-------|------|--------------------------------------------------------------------------------------------------|
| YOR134W   | BAG7  | -2.4 | Rho GTPase activating protein                                                                    |
| YBR240C   | THI2  | -2.3 | Transcriptional activator of thiamine biosynthetic genes                                         |
| YAL062W   | GDH3  | -2.3 | NADP(+)-dependent glutamate dehydrogenase                                                        |
| YDR170W-A |       | -2.3 | Retrotransposon TYA Gag gene                                                                     |
| YOR009W   | TIR4  | -2.2 | Cell wall mannoprotein                                                                           |
| YOL164W   | BDS1  | -2.2 | Bacterially-derived sulfatase                                                                    |
| YPL033C   | SRL4  | -2.2 | Protein involved in regulation of dNTP production                                                |
| YPL192C   | PRM3  | -2.2 | Pheromone-regulated protein required                                                             |
| YJL170C   | ASG7  | -2.1 | An a-specific gene that is induced by alpha factor                                               |
| YIL037C   | PRM2  | -2.1 | Pheromone-regulated protein                                                                      |
| YPL074W   | YTA6  | -2.1 | Putative ATPase                                                                                  |
| YLL046C   | RNP1  | -2.0 | Ribonucleoprotein that contains two RNA recognition motifs                                       |
| YMR107W   | SPG4  | -2.0 | Protein required for survival at high temperature during stationary phase                        |
| YOR068C   | VAM10 | -1.9 | Protein involved in vacuole morphogenesis                                                        |
| YOR358W   | HAP5  | -1.9 | Subunit of the heme-activated, glucose-repressed Hap2/3/4/5 CCAAT-binding complex,               |
| YNL194C   |       | -1.9 | Integral membrane protein required for sporulation and plasma membrane sphingolipid content      |
| YKL132C   | RMA1  | -1.9 | Putative dihydrofolate synthetase                                                                |
| YPL027W   | SMA1  | -1.8 | Protein of unknown function involved in the assembly of the prospore membrane during sporulation |
| YJL114W   |       | -1.8 | Retrotransposon TYA Gag gene                                                                     |
| YLR453C   | RIF2  | -1.6 | Protein that helps to control telomere length and to establish telomeric silencing               |
| YDR403W   | DIT1  | -1.6 | Sporulation-specific enzyme required for spore wall maturation                                   |
| YPL268W   | PLC1  | -1.5 | Phospholipase C                                                                                  |
| YOR076C   | SKI7  | -1.5 | Coupling protein that mediates 3'-5' RNA degradation                                             |
| YDR210C-C |       | -1.5 | Retrotransposon TYA Gag gene                                                                     |
| YDR261C-C |       | -1.4 | Retrotransposon TYA Gag gene                                                                     |
| YOL103W-A |       | -1.4 | Retrotransposon TYA Gag gene                                                                     |
| YDR490C   | PKH1  | 1.4  | Serine/threonine protein kinase involved in endocytosis and cell wall integrity                  |
| YPL049C   | DIG1  | 1.4  | MAP kinase-responsive inhibitor of the Ste12p transcription factor                               |
| YCR019W   | MAK32 | 1.4  | Protein necessary for structural stability of L-A double-stranded RNA-containing particles       |
| YGL208W   | SIP2  | 1.5  | One of three beta subunits of the Snf1 serine/threonine protein kinase complex                   |
| YGL107C   | RMD9  | 1.5  | Mitochondrial protein required for respiratory growth                                            |
| YPL161C   | BEM4  | 1.5  | Protein involved in establishment of cell polarity and bud emergence                             |
| YNL081C   | SWS2  | 1.5  | Putative mitochondrial ribosomal protein of the small subunit                                    |
| YBL103C   | RTG3  | 1.6  | Basic helix-loop-helix-leucine zipper (bHLH/Zip) transcription factor                            |
| YIL071C   | PCI8  | 1.6  | Protein with possible dual functions in transcriptional and translational control                |
| YHR011W   | DIA4  | 1.6  | Probable mitochondrial seryl-tRNA synthetase                                                     |

|         |       |     |                                                                                         |
|---------|-------|-----|-----------------------------------------------------------------------------------------|
| YGR215W | RSM27 | 1.7 | Mitochondrial ribosomal protein of the small subunit                                    |
| YDL240W | LRG1  | 1.7 | Putative GTPase-activating protein involved in the controls cell wall integrit          |
| YBR101C | FES1  | 1.7 | Hsp70 nucleotide exchange factor                                                        |
| YLR363C | NMD4  | 1.8 | Protein interacting with Nam7p                                                          |
| YDR264C | AKR1  | 1.8 | Palmitoyl transferase involved in protein palmitoylation                                |
| YNR020C | ATP23 | 1.9 | Putative metalloprotease of the mitochondrial inner membrane                            |
| YHR061C | GIC1  | 1.9 | Protein of unknown function involved in initiation of budding and cellular polarization |

---
