# Supplementary material for: The Role of the Yap5 Transcription Factor in Remodeling Gene Expression in Response to Fe Bioavailability
Source: PLOS journal article supplement (doi:10.1371/journal.pone.0037434), 2012-05-16
Supplement: S5 (10.1371/journal.pone.0037434.s005) [file journal.pone.0037434.s005]

(A)

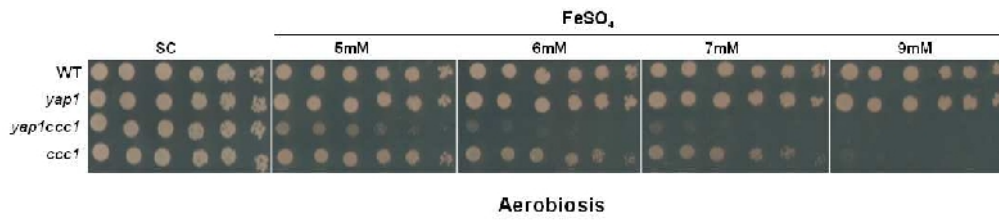

(B)

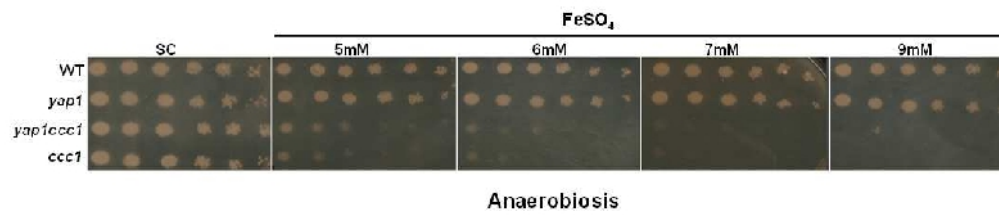

**Figure S2. In the absence of Ccc1, Yap1 is required for cells to overcome Fe-induced oxidative stress.** Exponentially growing cells from wild-type (BY4742), *yap1*, *yap1ccc1* and *ccc1* strains were harvested, serially diluted and spotted onto control SC plates or SC plates containing the indicated FeSO<sub>4</sub> concentrations under (A) aerobiosis and (B) anaerobiosis.
