# Supplementary material for: The Role of the Yap5 Transcription Factor in Remodeling Gene Expression in Response to Fe Bioavailability
Source: PLOS journal article supplement (doi:10.1371/journal.pone.0037434), 2012-05-16
Supplement: S6 (10.1371/journal.pone.0037434.s006) [file journal.pone.0037434.s006]

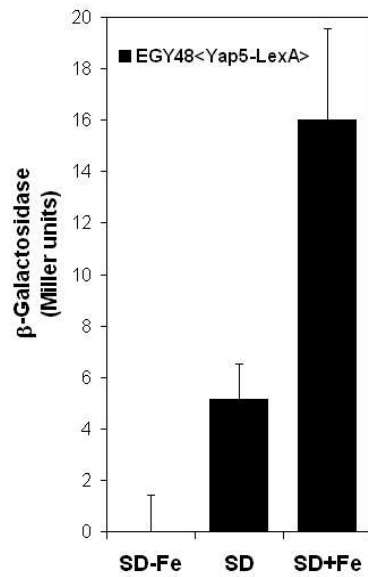

**Figure S3. Yap5 transactivation potential in different media used in this work.**

The transactivation potential of Yap5 in SD medium not supplemented (SD) or supplemented with 100 $\mu$ M of BPS (SD-Fe), or 2mM of FeSO<sub>4</sub> (SD+Fe), was assayed. EGY48 strain carrying pSH18-34 (a plasmid carrying a *lacZ* reporter gene) was transformed with Yap5-LexA and  $\beta$ -galactosidase activity was monitored as described in *Experimental procedures*. Values are the mean of triplicate samples of the same experiment  $\pm$  s.d.
